# Supplementary material for: Genomic comparison of sporeforming bacilli isolated from milk
Source: PubMed Central journal article supplement (PMC3902026; doi:10.1186/1471-2164-15-26), 2014-01-14
Supplement: 1471-2164-15-26-S3.pdf [file 1471-2164-15-26-S3.pdf]

Additional file 3. BLAST average nucleotide identity (ANIb), determined with the BLAST algorithm implemented in Jspecies, for *Paenibacillus* spp.

| Species                  | Strain (FSL) <sup>2</sup> | Percent of ANI (tetranucleotide signature) <sup>1</sup> |              |              |              |              |              |              |
|--------------------------|---------------------------|---------------------------------------------------------|--------------|--------------|--------------|--------------|--------------|--------------|
|                          |                           | R7-269                                                  | R5-192       | R7-277       | H7-689       | R5-808       | H8-457       | H8-237       |
| <i>P. sp.</i>            | R7-269                    | 100 (100)                                               | 68.72 (0.82) | 92.54 (0.99) | 68.69 (0.81) | 69.38 (0.88) | 69.42 (0.85) | 73.3 (0.85)  |
| <i>P. amylolyticus</i>   | R5-192                    |                                                         | 100 (100)    | 68.95 (0.82) | 97.39 (0.99) | 69.22 (0.81) | 69.13 (0.72) | 68.84 (0.84) |
| <i>P. sp.</i>            | R7-277                    |                                                         |              | 100 (100)    | 68.89 (0.81) | 69.42 (0.87) | 69.95 (0.85) | 73.57 (0.85) |
| <i>P. amylolyticus</i>   | H7-689                    |                                                         |              |              | 100 (100)    | 69.01 (0.80) | 69.14 (0.71) | 68.99 (0.84) |
| <i>P. glucanolyticus</i> | R5-808                    |                                                         |              |              |              | 100 (100)    | 83.21 (0.95) | 68.63 (0.87) |
| <i>P. lautus</i>         | H8-457                    |                                                         |              |              |              |              | 100 (100)    | 68.54 (0.80) |
| <i>P. odorifer</i>       | H8-237                    |                                                         |              |              |              |              |              | 100 (100)    |

<sup>1</sup> Strains with an ANI >95-96% and tetranucleotide value of >0.99 are likely to belong to the same bacterial species.

<sup>2</sup> The full strain designation includes the prefix FSL, e.g., FSL R7-269.
