# Supplementary material for: Genomic comparison of sporeforming bacilli isolated from milk
Source: PubMed Central journal article supplement (PMC3902026; doi:10.1186/1471-2164-15-26), 2014-01-14
Supplement: 1471-2164-15-26-S8.pdf [file 1471-2164-15-26-S8.pdf]

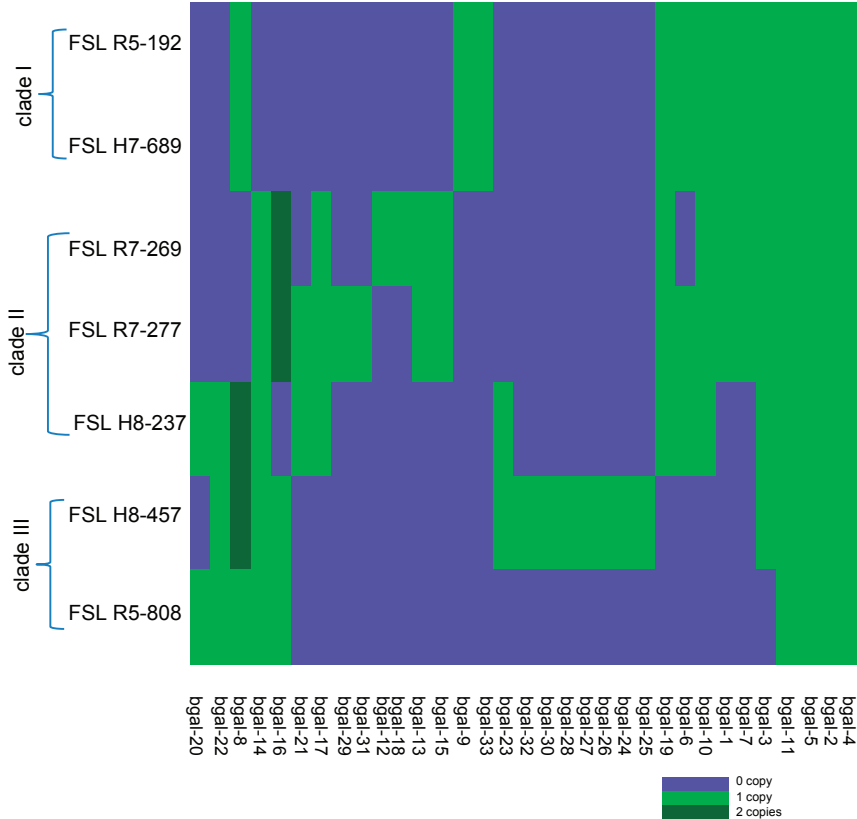

**Additional file 8.** Heatmap of the distribution of  $\beta$ -galactosidases in the seven *Paenibacillus* genomes. Blue indicates absence, green indicates presence, and dark green indicates two copies of a given  $\beta$ -galactosidase
