# Supplementary material for: Genomic comparison of sporeforming bacilli isolated from milk
Source: PubMed Central journal article supplement (PMC3902026; doi:10.1186/1471-2164-15-26), 2014-01-14
Supplement: 1471-2164-15-26-S9.pdf [file 1471-2164-15-26-S9.pdf]

Additional file 9. Comparison of unique genes identified in FSL H7-689 (grows at 6°C) and FSL R5-192 (does not grow at 6°C).

**Unique to FSL H7-689**

| <b>Gene function<sup>1</sup></b>                         | <b>No. Orfs in FSL H7-689 (location)</b> |
|----------------------------------------------------------|------------------------------------------|
| Non-ribosomal peptide antibiotic                         | 15 (17,970-51,516)                       |
| Methyltransferase, protein kinase, NTPases               | 6 (299,004-308,123)                      |
| Fe <sup>3+</sup> transport system                        | 2 (43,876-46,789)                        |
| Platelet-activating factor                               | 1 (178,435-179,940)                      |
| transposase                                              | 1 (63,518-64,636)                        |
| Proline-recognition domains                              | 1 (82,975-83,739)                        |
| NlpC/p60-like peptidase & RNA polymerase sigma-54 factor | 2 (5,261-7,928)                          |
| Reverse transcriptases                                   | 1 (47,266-51,117)                        |
| Aminoglycoside 3'-phosphotransferase                     | 1 (77,065-77,955)                        |
| Glycosyl hydrolase family 5                              | 1 (60,490-62,235)                        |
| Methyl viologen resistance                               | 2 (108,033-119,517)                      |
| Drug exporter                                            | 2 (267,644-271,417)                      |
| Integrase                                                | 1 (439,985-440,923)                      |
| Bacterial glycosyl hydrolases                            | 1 (458,693-459,769)                      |
| Sugar transport system                                   | 5 (471,797-478,386)                      |
| Bleomycin resistance, ferritin-like, among others        | 16 (82,249-93,854)                       |
| Putative phage proteins                                  | 5 (399,296-407,704)                      |
| Response regulator                                       | 2 (652,69-653,532)                       |
| S-layer domain                                           | 1 (659,489-656,769)                      |
| Restriction modification system & dead/box helicase      | 10 (700,395-716,031)                     |
| Putative phage protein                                   | 4 (152,848-156,660)                      |
| Sugar transport system                                   | 5 (118,640-126,140)                      |
| Integrase, protein kinase, among others                  | 8 (141,186-146,950)                      |
| O-Methyltransferase involved in polyketide biosynthesis  | 1 (238,713-239,627)                      |
| Abortive phage infection                                 | 1 (310,566-311,462)                      |
| Phage protein, among others                              | 5 (2,363-5,825)                          |
| Phage proteins                                           | 4 (232,876-237,621)                      |
| Sugar transport, among others                            | 16 (378,102-395,719)                     |
| Germination protein                                      | 1 (430,518-430,913)                      |
| Kinase & membrane protein                                | 2 (443,482-444,267)                      |
| Toxin-antitoxin                                          | 2 (86,284-86,687)                        |
| Putative phage proteins                                  | 11 (8,490-21,403)                        |
| Non-ribosomal peptide antibiotic                         | 32 (108,142-146,215)                     |
| Beta-glucosidase                                         | 1 (188,506-188,951)                      |
| Abortive phage infection, among others                   | 3 (200,239-202,206)                      |
| Drug transporter, among other                            | 4 (131,196-135,720)                      |
| NAD-dependent epimerase, among others                    | 3 (203,833-206,021)                      |
| Amino acid transport and                                 | 6 (377,008-382-328)                      |

|                                                         |                      |
|---------------------------------------------------------|----------------------|
| metabolism & metal transporter                          |                      |
| DNA helicase                                            | 1 (64,441-67,245)    |
| Efflux pump system                                      | 3 (76,449-78,944)    |
| Outer membrane lipoprotein & transcriptional regulators | 3 (177,029-180,322)  |
| Metallophosphoesterase                                  | 3 (167,529-171,018)  |
| Sugar transport and metabolism                          | 12 (204,963-219-706) |
| Lipoprotein, among others*                              | 9 (241,078-246,703)  |

#### Unique to FSL R5-192

| Gene function <sup>1</sup>                                     | No. Orfs in FSL R5-192 (location) |
|----------------------------------------------------------------|-----------------------------------|
| Flagella, integrase & salic acid metabolism                    | 14 (68,274-82,864)                |
| Copper amine oxidase                                           | 1 (104,888-106,114)               |
| Phosphatidylinositol phosphate kinase                          | 1 (350,924-351,721)               |
| Transposase & IS                                               | 2 (363,262-364,442)               |
| Periplasmic iron-binding protein                               | 1 (78,687-80,666)                 |
| Biotin uptake, sugar transporters, among others                | 13 (91,815-105,967)               |
| Phage related proteins                                         | 2 (168,400-169,235)               |
| Non-ribosomal peptide antibiotic, among others                 | 20 (186,330-228,843)              |
| Transposases & Tetratricopeptide repeat                        | 5 (114,620-120,235)               |
| NADPH-dependent FMN reductase*                                 | 1 (180,345-180,899)               |
| Short-chain alcohol dehydrogenases                             | 2 (22, 102-23,611)                |
| Thermoresistant glucokinase                                    | 2 (97,934-99,569)                 |
| Transposase*                                                   | 1 (1-400)                         |
| Sugar transporter, chitinase, cellulose, among others          | 8 (29,737-41,900)                 |
| Phage tail fibre                                               | 1 (108,462-110,228)               |
| Beta-lactamase & several hypothetical proteins                 | 9 (55,076-69,957)                 |
| Zinc-dependent metalloprotease                                 | 2 (72,359-73,569)                 |
| Metallo-beta-lactamase                                         | 2 (92,516-93,903)                 |
| Streptomycin 3'-adenylyltransferase                            | 1 (123,957-124,523)               |
| Retron-type reverse transcriptase*                             | 1 (110-1,402)                     |
| Phage related proteins                                         | 13 (600,025-612,017)              |
| Endonuclease, Haloacid dehalogenase, among others              | 12 (809,321-820,059)              |
| Di-peptide transport system                                    | 13 (941,383-956,383)              |
| Rod shape-determining protein RodA                             | 2 (1,055, 962-1,057,643)          |
| Partitioning protein ParA, among several hypothetical proteins | 6 (1,141,824-1, 147,731)          |
| RNA polymerase sigma factor                                    | 2 (1,310,887-1,313,002)           |
| Methyltransferase                                              | 1 (1,386,288-1,385,962)           |
| Nucleoside deaminases                                          | 1 (1,439,807-1,440,352)           |
| Acetyltransferase                                              | 1 (51,143-51,709)                 |

|                                                                |                      |
|----------------------------------------------------------------|----------------------|
| Bleomycin resistance & Disulfide Oxidoreductases               | 4 (92,321-95,323)    |
| hydroxymyristoyl-[acyl carrier protein] dehydratase and others | 5 (110,559-114,738)  |
| Beta-xylosidase & Beta-glucosidase                             | 3 (130,242-136,429)  |
| Methyltransferase & helicase                                   | 2(189,224-192,285)   |
| Arsenical resistance operon                                    | 3 (224,940-227,093)  |
| Transposase*                                                   | 2 (337,517-338,494)  |
| Transposase*                                                   | 1 (249-1427)         |
| Transposase                                                    | 4 (104,264-106,592)  |
| S-layer protein*                                               | 1 (57,613-61,209)    |
| Macrolide 2'-phosphotransferase                                | 1 (85,071-86,009)    |
| NUDIX hydrolase                                                | 1 (111,777-112,394)  |
| NAD-dependent epimerase/dehydratase                            | 2 (120,076-121,581)  |
| Fibronectin type III protein                                   | 2 (190,375-192,127)  |
| Transcriptional regulator                                      | 2(16,303-17,142)     |
| Transposase*                                                   | 1 (97,771-98,107)    |
| Transposase*                                                   | 1 (1-963)            |
| Phytoene dehydrogenase & sigma factor 70                       | 2(31,175-33,395)     |
| ADP-ribose pyrophosphatase, among others                       | 4 (87,753-90,746)    |
| Sugar transport system                                         | 9 (115,603-129,948)  |
| Type VII secretion target                                      | 2 (284,474-286,173)  |
| Phage related proteins*                                        | 1-7,950              |
| Phosphatase/phosphohexomutase, among others                    | 5 (53,596-57,247)    |
| Lipid A permease, MDR protein, among others                    | 25 (94,004-119,120)  |
| Gene regulation proteins                                       | 4 (154,465-161,485)  |
| FAD-dependent oxidoreductas                                    | 4 (33,865-36,947)    |
| Iron-siderophore & transposases                                | 5 (67,317-72,082)    |
| Cobalt transport system                                        | 7 (88,075-93,775)    |
| Nucleoside Triphosphate Hydrolases                             | 3 (83,434-85,706)    |
| Aminoglycoside phosphotransferase                              | 1 (186,506-187,459)  |
| Beta-glucosidase & mobile element associated proteins*         | 9 (1-11,008)         |
| L-proline glycine betaine ABC transport system                 | 5 (26,039-30,021)    |
| Glycoside hydrolase, among others                              | 16 (60,141-77,893)   |
| Protease, endonuclease, peroxidase                             | 11 (84,464-98,267)   |
| Metal chaperone                                                | 3 (149,296-150,632)  |
| Beta-lactamase, phage protein, among others                    | 8(237,326-246,024)   |
| Phage (complete)*                                              | 30 (357,722-383,535) |
| Phage (complete)*                                              | 61 (1-39,974)        |
| Transposase*                                                   | 4 (1-4,759)          |
| reverse transcriptase, dextranase,                             | 22 (26,243-53,964)   |

|                   |                     |
|-------------------|---------------------|
| among others      |                     |
| Acetyltransferase | 2 (277,604-279,590) |
| Transposase*      | 1 (375,634-376,596) |

<sup>1</sup> Hypothetical proteins are not included.

\* Genes located where contigs end or start.
