# Supplementary material for: Genomic comparison of sporeforming bacilli isolated from milk
Source: PubMed Central journal article supplement (PMC3902026; doi:10.1186/1471-2164-15-26), 2014-01-14
Supplement: 1471-2164-15-26-S10.pdf [file 1471-2164-15-26-S10.pdf]

Additional file 10. Subcategories over-represented in clade II and in cold-adapted strains

| RAST Subcategory                                                   | Clade II vs clade III $p$ -value <sup>1</sup> | Cold-adapted vs non-cold-adapted $p$ -value <sup>1</sup> | Example of proteins in a given subcategory                                                                                           | Potential implication for cold growth in milk                                                                                                                                                                   |
|--------------------------------------------------------------------|-----------------------------------------------|----------------------------------------------------------|--------------------------------------------------------------------------------------------------------------------------------------|-----------------------------------------------------------------------------------------------------------------------------------------------------------------------------------------------------------------|
| Inorganic sulfur assimilation                                      | 2.86e-11                                      | 9.68e-6                                                  | Sulfate binding protein, sulfate transport permease, sulfite reductase                                                               | Unclear, but volatile sulfur is found in UHT milk, sulfur is one of the minerals in milk                                                                                                                        |
| Protein and nucleoprotein secretion system, Type IV                | 4.54e-9                                       | 6.08e-10                                                 | Type IV pilus biogenesis (PilV, PilT, PilC, PilV, PilM)                                                                              | Surface motility, biofilm formation                                                                                                                                                                             |
| Di- and oligosaccharides                                           | 1.46e-10                                      | 1.42e-7                                                  | Sugar ABC transporters, $\beta$ -galactosidase, galactoside ABC transport protein, $\alpha$ -glucosidase, PTS system, beta-glucoside | Lactose and galactose uptake and utilization. Involved in energy acquisition                                                                                                                                    |
| Lacto-N-Biose I and Galacto-N-Biose Metabolic Pathway <sup>2</sup> | 1.49e-5                                       | 0.002                                                    | UDP-glucose 4-epimerase, Lacto-N-biose phosphorylase                                                                                 | Involved in Leloir pathway of galactose metabolism. Lacto-N-Biose I and Galacto-N-Biose metabolic pathway involved in intestinal colonization by <i>Bifidobacterium</i> . May be involved in energy acquisition |
| Membrane Transport - no subcategory                                | 0.0005                                        | 0.001                                                    | Cobalt transporters CbiMNQO                                                                                                          | Unclear, cobalt is an essential cofactor of coenzyme B12                                                                                                                                                        |
| One-carbon Metabolism                                              | 0.003                                         | 0.01                                                     | Serine-pyruvate aminotransferase, formaldehyde lyase, Formate--tetrahydrofolate ligase                                               | Unclear, may be involved in energy acquisition                                                                                                                                                                  |
| Biotin                                                             | 0.003                                         | 0.05                                                     | Biotin operon repressor, biotin-                                                                                                     | Unclear, biotin is an essential co-                                                                                                                                                                             |

|                                              |       |       |                                                                               |                                                                                            |
|----------------------------------------------|-------|-------|-------------------------------------------------------------------------------|--------------------------------------------------------------------------------------------|
|                                              |       |       | protein ligase, biotin synthase                                               | factor for carboxylase enzymes.<br>May be necessary for high efficiency energy acquisition |
| Stress response                              | 0.008 | 0.008 | Serine phosphatase, phosphodiesterase                                         | Unclear, involved in gene regulation                                                       |
| Nucleosides and Nucleotides - no subcategory | 0.03  | 0.05  | Ribonucleotide reductase, hydantoin racemase, Purine nucleoside phosphorylase | Unclear, involved in DNA metabolism and may be involved in growth                          |

<sup>1</sup>Actual *p*-value are reported; a Bonferroni corrected adjusted *p*-value cutoff would be  $p < 0.00049$ ; this is a highly conservative correction and we leave it to the reader to use the cutoff they deem appropriate.

<sup>2</sup>This subcategory was designated in RAST as “carbohydrates-no subcategory; role: Lacto-N-Biose I and Galacto-N-Biose Metabolic Pathway”
