# Supplementary material for: Genomic comparison of sporeforming bacilli isolated from milk
Source: PubMed Central journal article supplement (PMC3902026; doi:10.1186/1471-2164-15-26), 2014-01-14
Supplement: 1471-2164-15-26-S11.pdf [file 1471-2164-15-26-S11.pdf]

|                  |            | Biotin | Stress response | Protein and nucleoprotein secretion system | Membrane transport | Nucleosides and Nucleotides | Lacto-N-Biose I and Galacto-N-Biose Metabolic Pathway1 | Inorganic sulfur assimilation | Di- and oligosaccharides |
|------------------|------------|--------|-----------------|--------------------------------------------|--------------------|-----------------------------|--------------------------------------------------------|-------------------------------|--------------------------|
| non cold-adapted | clade III  |        |                 |                                            |                    |                             |                                                        |                               |                          |
|                  | FSL R5-808 | 11     | 8               | 0                                          | 5                  | 10                          | 0                                                      | 0                             | 81                       |
|                  | FSL H8-457 | 6      | 14              | 0                                          | 3                  | 12                          | 0                                                      | 0                             | 99                       |
| cold-adapted     | clade II   |        |                 |                                            |                    |                             |                                                        |                               |                          |
|                  | FSL R7-277 | 26     | 19              | 11                                         | 14                 | 18                          | 7                                                      | 15                            | 169                      |
|                  | FSL H8-237 | 9      | 21              | 13                                         | 12                 | 18                          | 8                                                      | 17                            | 134                      |
|                  | FSL R7-269 | 19     | 21              | 14                                         | 14                 | 18                          | 7                                                      | 16                            | 161                      |

**Additional file 11.** Number of genes in RAST subcategory shown to be significantly over-represented in clade II genomes as compared to clade III genomes. For each RAST subcategory, gene numbers were color coded as representing (i) high number of genes in a specific subcategory (light gray) and (2) low number of genes in a given subcategory (dark gray); the cut-off between these categories were arbitrary. The two non cold-adapted clade III strains are shown above the three cold-adapted clade II strains.
