# Supplementary material for: Genomic comparison of sporeforming bacilli isolated from milk
Source: PubMed Central journal article supplement (PMC3902026; doi:10.1186/1471-2164-15-26), 2014-01-14
Supplement: 1471-2164-15-26-S13.pdf [file 1471-2164-15-26-S13.pdf]

Additional file 13. PFAM Models used in identification of genes encodings bacteriocins, non-ribosomal peptide antibiotics,  $\beta$ -galactosidases, and glycosyl hydrolases.

| <b>Name</b>                              | <b>description</b>                                      | <b>Pfam accession</b> |
|------------------------------------------|---------------------------------------------------------|-----------------------|
| <b>Bacteriocins</b>                      |                                                         |                       |
| BacteriocIIc_cy                          | Bacteriocin class IIc cyclic gassericin A-like          | PF12173               |
| Bacteriocin_II                           | Class II bacteriocin                                    | PF01721               |
| Bacteriocin class II d                   | Bacteriocin class II d cyclical uberolysin-like         | PF09221               |
| Bacteriocin_III                          | Aureocin-like type II bacteriocin                       | PF11758               |
| Cloacin                                  | Colicin-like bacteriocin tRNase domain                  | PF03515               |
| Colicin_immun                            | Bacterial self-protective colicin-like immunity         | PF09204               |
| Colicin-DNase                            | DNase/tRNase domain of colicin-like bacteriocin         | PF12639               |
| EntA_Immun                               | Enterocin A Immunity                                    | PF08951               |
| Lactococcin                              | Lactococcin-like family                                 | PF04369               |
| Lactococcin_972                          | Bacteriocin (Lactococcin_972)                           | PF09683               |
| Bacteriocin_IIc                          | Bacteriocin class II with double-glycine leader peptide | PF10439               |
| <b>Non ribosomal peptide antibiotics</b> |                                                         |                       |
| KR                                       | KR domain                                               | PF08659               |
| FAE1_CUT1_RppA                           | FAE1/Type III polyketide synthase-like protein          | PF08392               |
| Docking                                  | Erythronolide synthase docking                          | PF08990               |
| Ferritin-like                            | Ferritin-like                                           | PF12902               |
| McyA_C                                   | Microcystin synthetase C terminal                       | PF12593               |
| Erythro-docking                          | Erythronolide synthase, docking                         | PF09277               |
| ketoacyl-synt                            | Beta-ketoacyl synthase, N-terminal domain               | PF00109               |
| Ketoacyl-synt_C                          | Beta-ketoacyl synthase, C-terminal domain               | PF02801               |
| Cyclase_polyket                          | Polyketide synthesis cyclase                            | PF04673               |
| p450                                     | Cytochrome P450                                         | PF00067               |
| Polyketide_cyc                           | Polyketide cyclase                                      | PF03364               |
| ABM                                      | Antibiotic biosynthesis monooxygenase                   | PF03992               |
| Polyketide_cyc2                          | Polyketide cyclase                                      | PF10604               |
| <b>B-galactosidase</b>                   |                                                         |                       |
| Glyco_hydro_42                           | Beta-galactosidase                                      | PF02449               |
| Bgal_small_N                             | Beta galactosidase small chain                          | PF02929               |
| Glyco_hydro_42M                          | Beta-galactosidase trimerisation domain                 | PF08532               |
| Glyco_hydro_42C                          | Beta-galactosidase C-terminal domain                    | PF08533               |

|                            |                                      |            |
|----------------------------|--------------------------------------|------------|
| BetaGal_dom2               | Beta-galactosidase, domain 2         | PF10435    |
| BetaGal_dom3               | Beta-galactosidase, domain 3         | PF13363    |
| BetaGal_dom4_5             | Beta-galactosidase jelly roll domain | PF13364    |
| <b>Glycosyl hydrolases</b> |                                      |            |
| Glyco_hydro_42             | Beta-galactosidase                   | PF02449.10 |
| Glyco_hydro_35             | Glycosyl hydrolases family 35        | PF01301.14 |
| Glyco_hydro_2              | Glycosyl hydrolases family 2         | PF00703.16 |
| Glyco_hydro_1              | Glycosyl hydrolase family 1          | PF00232.13 |
